# Supplementary material
Source: PubMed Central journal article supplement (PMC3220525)
Supplement: supp_M111.288845_jbc.M111.288845-1.pdf [file supp_M111.288845_jbc.M111.288845-1.pdf]

|                                                  | Forward primer                        | Reverse primer                          |
|--------------------------------------------------|---------------------------------------|-----------------------------------------|
| <i>Cloning of Leptopilina Cu,ZnSODs</i>          |                                       |                                         |
| LbmSOD1/LbySOD1                                  | CCCAACCATGGCGATTAAGCAGTTTGTG          | GAGTCGCTCGAGTCAGTTTTTGGTGATGCCGATAACAC  |
| LhSOD3                                           | CGCACCATGGGACAAGAATTAAGAGCTGT<br>GGTA | GACTCGCTCGAGCTACTGAATTCCAACGATTCCACATGC |
| <i>Semi-quantitative and quantitative RT-PCR</i> |                                       |                                         |
| LbmSOD1/LbySOD1                                  | CGCTTGCTTCTACGTTTCT                   | GCTGGACCACATTTCAATCC                    |
| LbmSOD3/LbySOD3                                  | ATGACTGCCTCCCCTTCTTT                  | CTGGTCTCACGGTTTCCAT                     |
| LhSOD1                                           | CACCATCACTGCCTGCTTC                   | ATACCAATGGTTGCACGAGT                    |
| LhSOD3                                           | CTTTAGCCGTCCAATCTTCG                  | ATCCTGAACGGGTGAATCAT                    |
| LbITS2                                           | ACAAAATGGCAAGTCAAACAA                 | CATTGACACAACGACAATAGTCAA                |
| LhITS2                                           | TCATCGGTCTGAAGTATAACTTACTCAT          | CACAAACAACCTTCTATTGAACGA                |

Supplementary Table 1. Primer pairs used for cloning *Leptopilina* Cu,ZnSODs and performing semi-quantitative and quantitative RT-PCR experiments.
